# Supplementary material
Source: PubMed Central journal article supplement (PMC2729346)
Supplement: supp_136_14_2335__1.pdf [file supp_136_14_2335__1.pdf]

**Table S1. TUNEL analysis for third instar Garland cells**

| Genotype                                                                | Imaged nuclei (sample) | TUNEL positive             |       |
|-------------------------------------------------------------------------|------------------------|----------------------------|-------|
|                                                                         |                        | Number of positive signals | %     |
| <i>sns-GCN-nGFP, sns-GCN-Gal4/+</i>                                     | 181 (4)                | 6                          | 3.31  |
| <i>sns-GCN-nGFP, sns-GCN-Gal4/UAS-sns-IR(1)</i>                         | 180 (4)                | 70                         | 38.90 |
| <i>sns-GCN-nGFP, sns-GCN-Gal4/UAS-sns-IR(2)</i>                         | 93 (4)                 | 38                         | 40.86 |
| <i>sns-GCN-nGFP, sns-GCN-Gal4/UAS-duf-IR(1)</i>                         | 102 (3)                | 52                         | 50.90 |
| <i>sns-GCN-nGFP, sns-GCN-Gal4/UAS-duf-IR(2)</i>                         | 109 (4)                | 18                         | 16.51 |
| <i>sns<sup>4.3</sup>, Act5C-Gal4/sns<sup>4.3</sup>, UAS-2xEGFP</i>      | 83 (4)                 | 36                         | 43.37 |
| <i>sns-GCN-nGFP, sns-GCN-Gal4/UAS-pyd-IR</i>                            | 144 (4)                | 14                         | 9.72  |
| <i>sns-Gal4/sns<sup>zf1.4</sup>, UAS-sns[C-HA]</i>                      | 66 (3)                 | 0                          | 0     |
| <i>sns<sup>zf1.4</sup>, sns-Gal4/sns<sup>zf1.4</sup>, UAS-sns[C-HA]</i> | 101 (4)                | 22                         | 21.80 |
| <i>sns-Gal4/sns<sup>zf1.4</sup>, UAS-sns[mlg4]</i>                      | 64 (4)                 | 18                         | 28.13 |
| <i>sns<sup>zf1.4</sup>, sns-Gal4/sns<sup>zf1.4</sup>, UAS-sns[mlg4]</i> | 34 (3)                 | 16                         | 47.06 |
| <i>sns-Gal4/sns<sup>zf1.4</sup>, UAS-sns[mlg6]</i>                      | 92 (3)                 | 0                          | 0     |
| <i>sns<sup>zf1.4</sup>, sns-Gal4/sns<sup>zf1.4</sup>, UAS-sns[mlg6]</i> | 25 (3)                 | 17                         | 68.00 |
